# Supplementary material
Source: publisher site journal article supplement (https://www.spandidos-publications.com/1475/downloadSupplementary)

Figure S1. Stable body weight curves of treated mice (n=5). The weight in the digitoxin group does not differ significantly compared to the group without digitoxin treatment. The body weight (g) of mice is shown as the means  $\pm$  SEM.

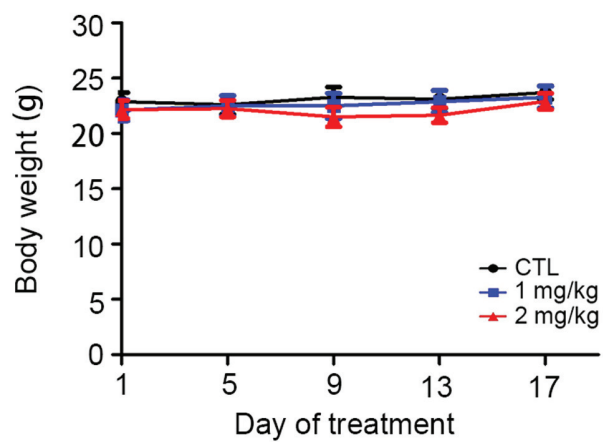

Supplement: Supplementary file 1 [file downloadSupplementary]
